# Supplementary material
Source: PubMed Central journal article supplement (PMC3594777)
Supplement: NIHMS440940-supplement-SupplInfoLMEPlots.pdf [file NIHMS440940-supplement-SupplInfoLMEPlots.pdf]

**Supplementary Information related to LME analysis.**  
**Choe et al**

These are plots of changes in relative expression of particular peptides versus time for subjects A and B. The patterns are grouped by peptide sequence and the corresponding accession number is shown. Only those peptides shown were found to be significant by the LME model (Table 4). Note that the colors within each plot simply represent individual peptides and are used for clarity of presentation. There is no correlation of these colors with the colors used in the visualization tool presented in Figure 3 of the manuscript. The vertical axis is a log base 2 representation of the expression change.

The plots are presented on the following pages.

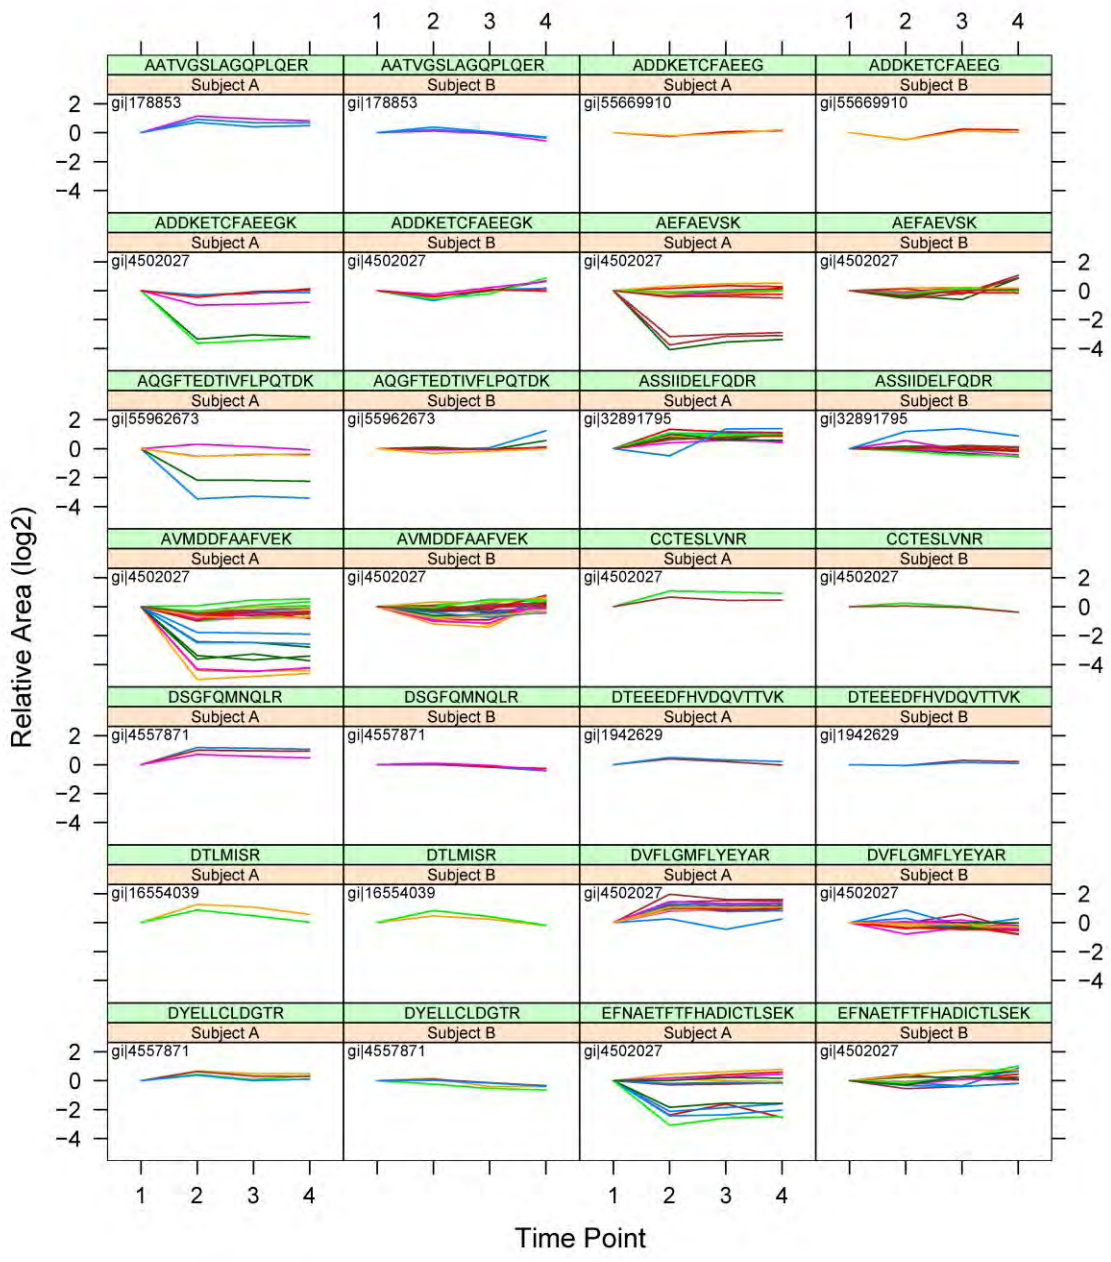

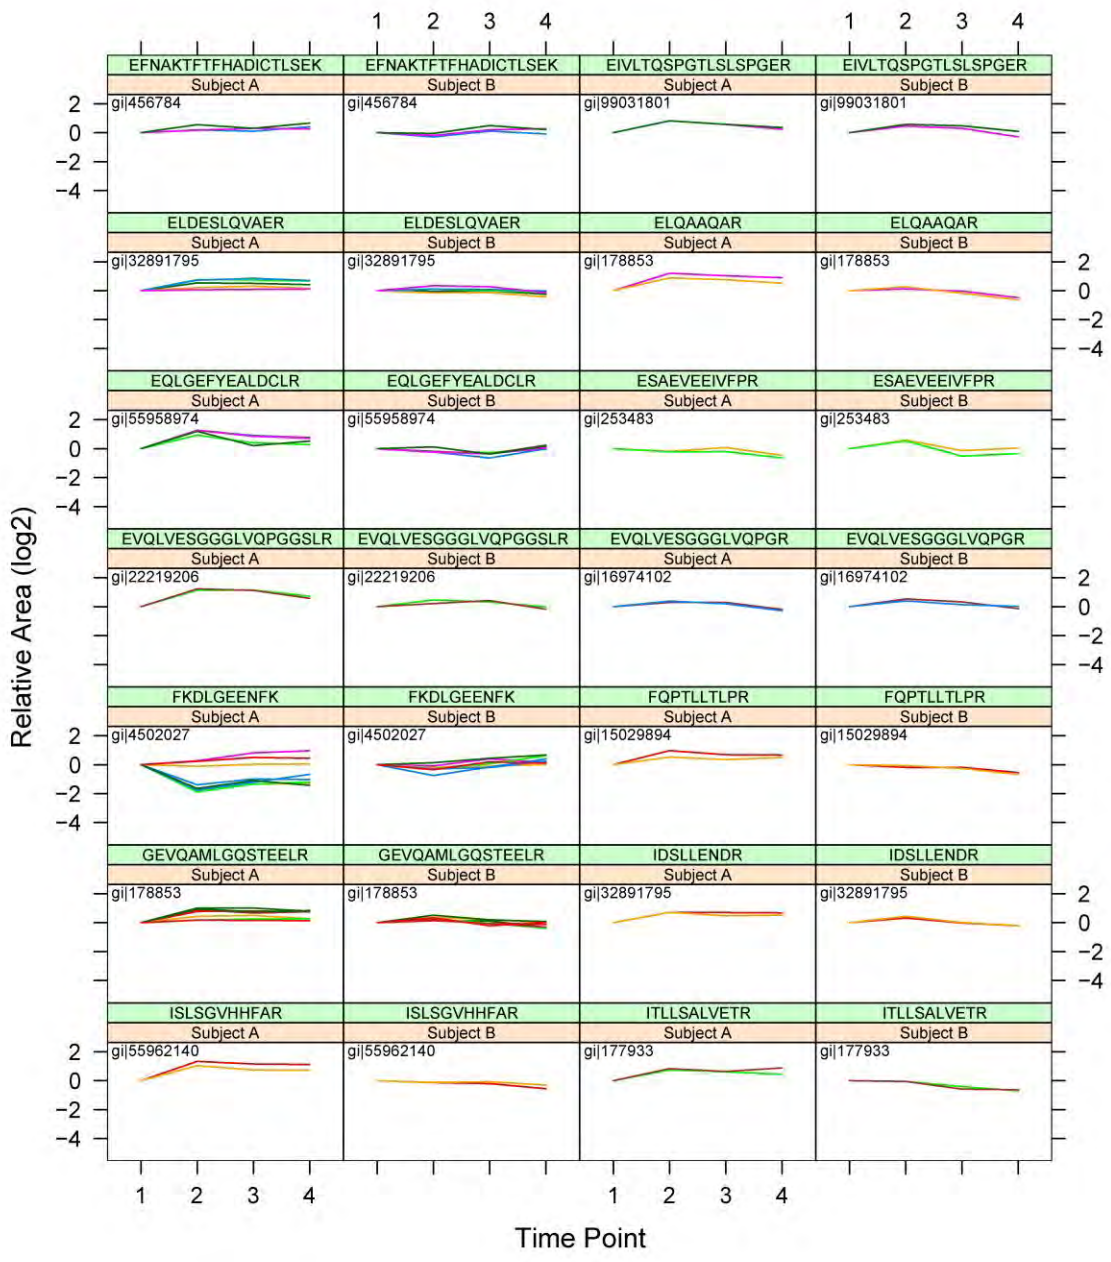

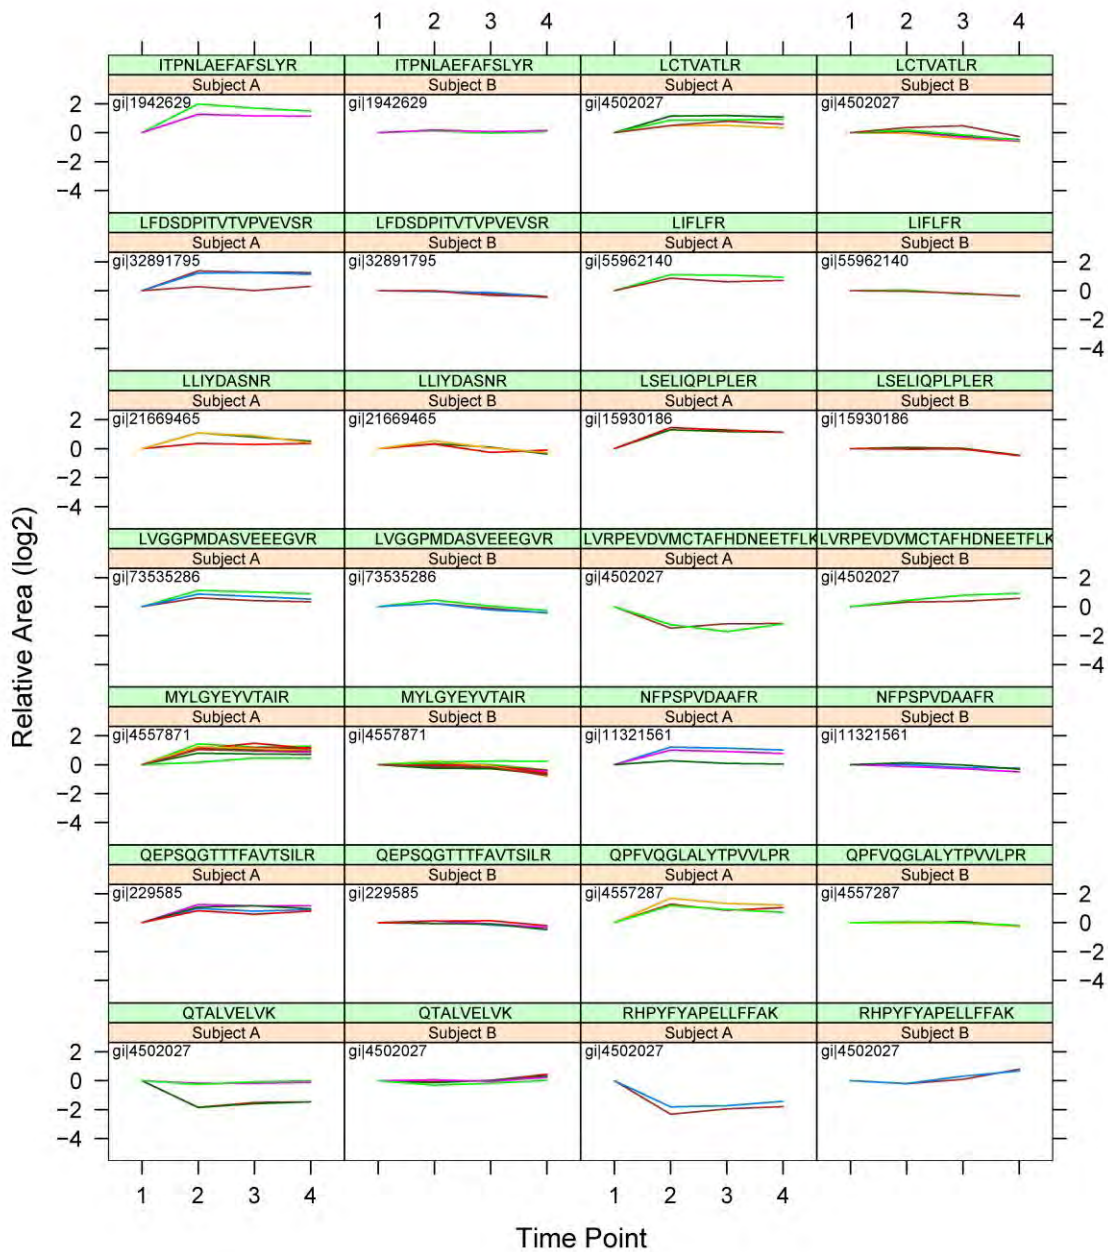



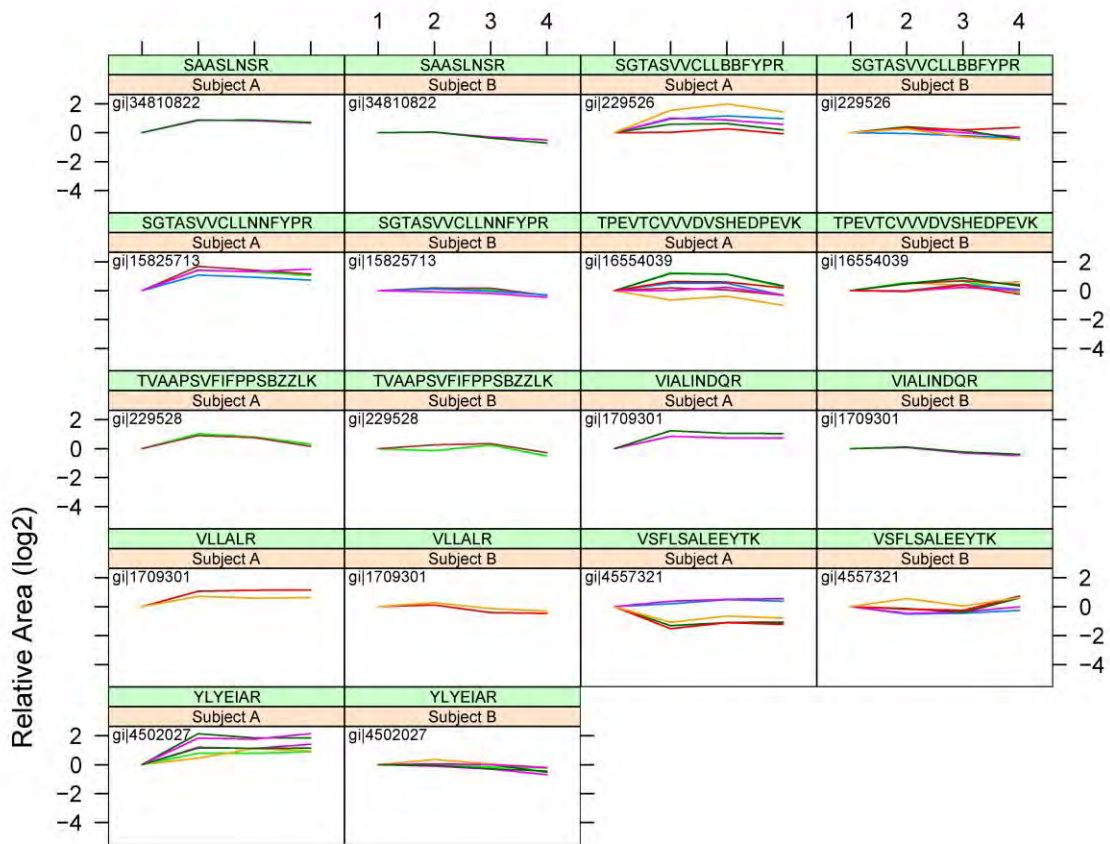

Time Point
